# Supplementary material for: Subcellular optogenetic inhibition of G proteins generates signaling gradients and cell migration
Source: PubMed Central journal article supplement — Mol Biol Cell. 2014 Aug 1;25(15):2305–14. doi: 10.1091/mbc.E14-04-0870 (PMC4116304; doi:10.1091/mbc.e14-04-0870), 2014-08-01

# Supplemental Materials

*Molecular Biology of the Cell*

O'Neill and N. Gautam.

## Subcellular optogenetic inhibition of G proteins generates signaling gradients and cell migration

Patrick R. O'Neill<sup>a</sup>, N. Gautam<sup>a,b</sup>

Department of <sup>a</sup>Anesthesiology and <sup>b</sup>Genetics

Washington University School of Medicine, St. Louis, MO 63110, USA

### Supplemental figure legends

**Fig. S1.** CRY2-mCh lacking the RGS4 $\Delta$  domain is not capable of inducing reverse  $\beta\gamma$  translocation. Images show a HeLa cell expressing CRY2-mCh, CIBN-CaaX, and YFP- $\gamma$ 9. The corresponding plot shows the mean intensity values of CRY2-mCh and YFP- $\gamma$ 9 at the plasma membrane within the region of OA. Endogenous CXCR4 receptors were activated with 50 ng/ml SDF-1 $\alpha$  (2:05), resulting in YFP- $\gamma$ 9 translocation to intracellular membranes. Unlike CRY2-mCh-RGS4 $\Delta$  (Fig.2), localized optical recruitment of CRY2-mCh to the plasma membrane did not lead to reverse  $\beta\gamma$  translocation. Receptor deactivation by 20  $\mu$ M AMD-3100 did however lead to reverse  $\beta\gamma$  translocation. These results show that the ability of CRY2-mCh-RGS4 $\Delta$  to induce reverse  $\beta\gamma$  translocation (Fig.2) is due to its GAP activity rather than a peculiar effect caused by OA or the use of CRY2/CIBN constructs.

**Fig. S2.** CRY2-mCh-RGS4 $\Delta$  can initiate migratory responses in opposite directions in two nearby cells. Localized OA was applied to two RAW 264.7 cells expressing CRY2-mCh-RGS4 $\Delta$ , CIBN-CaaX, PH(Akt)-Venus, and CXCR4, followed by uniform receptor activation with 50 ng/ml SDF-1 $\alpha$ . OA was applied on opposite sides for the two cells. The DIC image sequence shows that both cells generated lamellipodia oriented in the direction opposite to the side of OA. After the last frame (12:40), images were captured in the mCh and Venus channels to verify subcellular localization of the CRY-RGS construct and PIP3 sensor.

**Fig. S3.** Reversing the side of OA reverses the directional responses in a RAW cell expressing CRY2-mCh-RGS4 $\Delta$ , CIBN-CaaX, PH(Akt)-Venus, and CXCR4. Receptors were activated with 50 ng/ml SDF-1 $\alpha$  (2:05). Upon localized OA at one side of the cell, the cell generated a PIP3

gradient and initiated migration in the direction opposite to the side of OA. This directional response was reversed upon switching the side of OA with respect to the cell.

**Fig. S4.** Light-triggered localization of CRY2-mCh does not generate directional PIP3 or migratory responses. Images show a RAW cell expressing CRY2-mCh, CIBN-CaaX, PH(Akt)-Venus, and CXCR4. Similar to CRY2-mCh-PGK1 (Fig. 3D), localized optical recruitment of CRY2-mCh to the plasma membrane does not influence the direction of PIP3 responses or lamellipodia formation. These negative controls show that the directional effects generated by the CRY2-RGS and CRY2-GRKct constructs are due to their ability to inhibit G protein subunit activity.

**Fig. S5.** Directional migration initiation in a RAW cell with uniform activation of endogenous C5a receptors and localized G protein inhibition by CRY2-mCh-RGS4 $\Delta$ . Images show a RAW cell expressing CRY2-mCh-RGS4 $\Delta$ , CIBN-CaaX, and PH(Akt)-Venus. C5a receptors were activated with 10  $\mu$ M FKP-(D-Cha)-Cha-r, resulting in a uniform PIP3 response and cell protrusions. Upon adaptation of these transient responses, subsequent localized OA resulted in the formation of a PIP3 gradient and migration initiation oriented in the direction opposite to the side of OA.

**Fig. S6.** A CRY-GRK3ct construct can generate directionally responsive PIP3 and lamellipodia responses similar to the CRY-GRK2ct construct. (A) Images show a RAW cell expressing CRY2-mCh-GRK3ct, CIBN-CaaX, PH(Akt)-Venus, and CXCR4. (B) Time-stacks corresponding to the images in (A). Optical recruitment of the CRY-GRK3ct construct to one side of the cell, together with uniform receptor activation by 50 ng/ml SDF-1 $\alpha$  resulted in a PIP3 gradient and lamellipodia oriented in the direction opposite to the side of OA. Switching the side of OA reversed these directional responses.

**Fig. S7.** Localized  $\beta\gamma$  inhibition directs the formation of a PIP3 gradient and cell protrusions in a RAW cell with uniform activation of endogenous C5a receptors. Images show a RAW cell expressing CRY2-mCh-GRK2ct, CIBN-CaaX, and PH(Akt)-Venus. Following optical recruitment of the CRY2-GRKct construct to one side of the cell, C5a receptors were activated with 10  $\mu$ M FKP-(D-Cha)-Cha-r. This resulted in the formation of a PIP3 gradient and cell protrusions oriented in the direction opposite to the side of OA.

## Supplemental movie legends

**Movie 1.** Local OA of CRY2-mCh-RGS4 $\Delta$  followed by uniform activation of CXCR4. The movie shows a RAW cell expressing CRY2-mCh-RGS4 $\Delta$  (red), CIBN-CaaX, PH(Akt)-Venus (green), and CXCR4. Localized OA (white box) was applied to recruit the CRY2-RGS construct to one side of the cell. Subsequent addition of spatially uniform SDF-1 $\alpha$  (50ng/ml) initiated cell migration in the opposite direction relative to the side of OA. The movie corresponds to the data presented in Fig. 3A.

**Movie 2.** Uniform activation of CXCR4 followed by local OA of CRY2-mCh-RGS4 $\Delta$ . The movie shows a RAW cell expressing CRY2-mCh-RGS4 $\Delta$  (red), CIBN-CaaX, PH(Akt)-Venus (green), and CXCR4. SDF-1 $\alpha$  (50ng/ml) was added prior to OA, resulting in a PIP3 increase and cell protrusions. Localized OA was then applied to one side of the cell, resulting in the initiation of cell migration in the opposite direction.

**Movie 3.** Local OA of CRY2-mCh-GRK2ct followed by uniform activation of CXCR4. The movie shows a RAW cell expressing CRY2-mCh-GRK2ct (red), CIBN-CaaX, PH(Akt)-Venus (green), and CXCR4. The CRY-GRKct construct was optically recruited to one side of the cell. Subsequent receptor activation by 50 ng/ml SDF-1 $\alpha$  resulted in the generation of a PIP3 gradient and lamellipodia oriented in the opposite direction relative to the side of OA. Switching the side of OA caused these responses to reverse direction.

**Movie 4.** Adaptation to uniform CXCR4 activation followed by local OA of CRY2-mCh-RGS4 $\Delta$ . The movie shows a RAW cell expressing CRY2-mCh-RGS4 $\Delta$  (red), CIBN-CaaX, PH(Akt)-Venus (green), and CXCR4. Receptors were activated with SDF-1 $\alpha$  (50ng/ml) leading to the generation of PIP3 and cell protrusions. After these responses adapted, localized OA of the CRY-RGS construct to one end of the cell resulted in the generation of a PIP3 gradient and migration initiation in the direction opposite to the side of OA. The movie corresponds to the data presented in Fig. 5.

Figure S1.

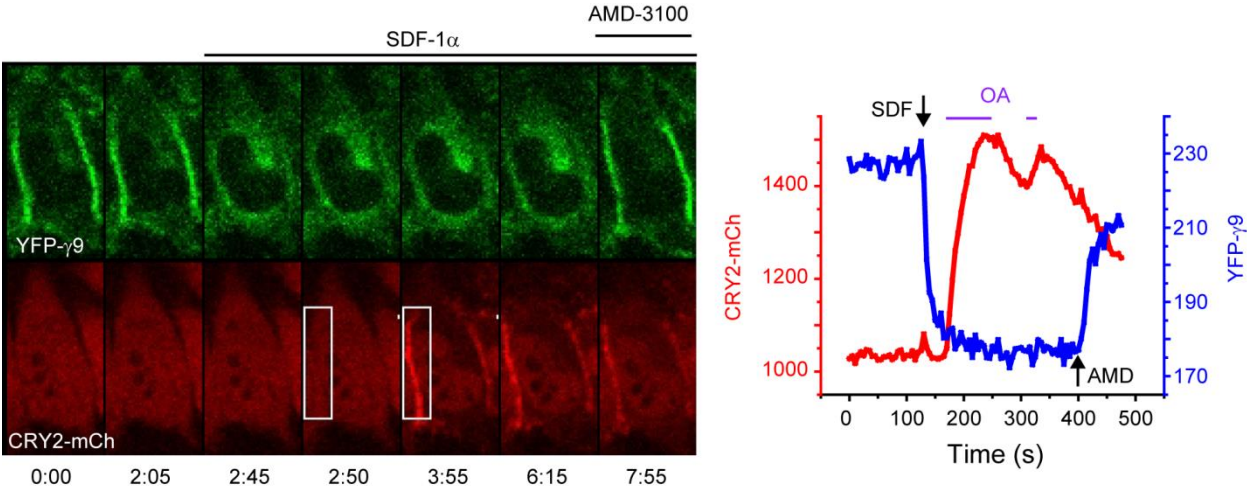

Figure S2.

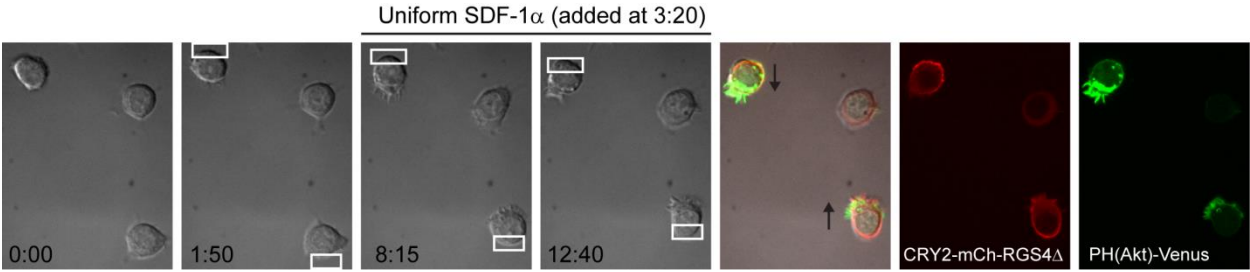

Figure S3.

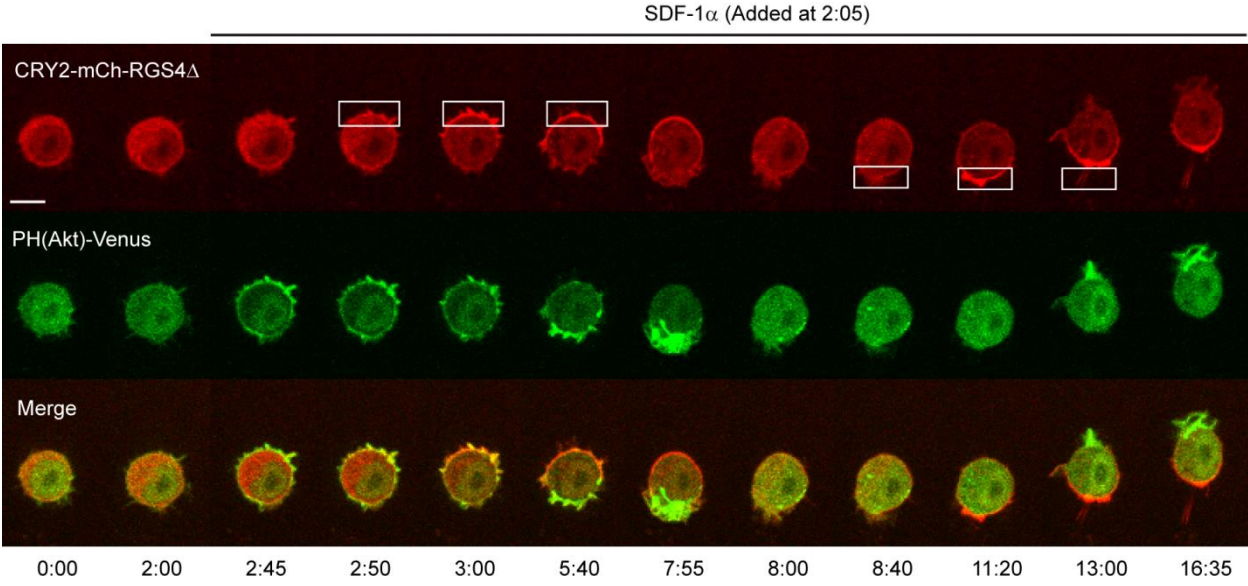

Figure S4.

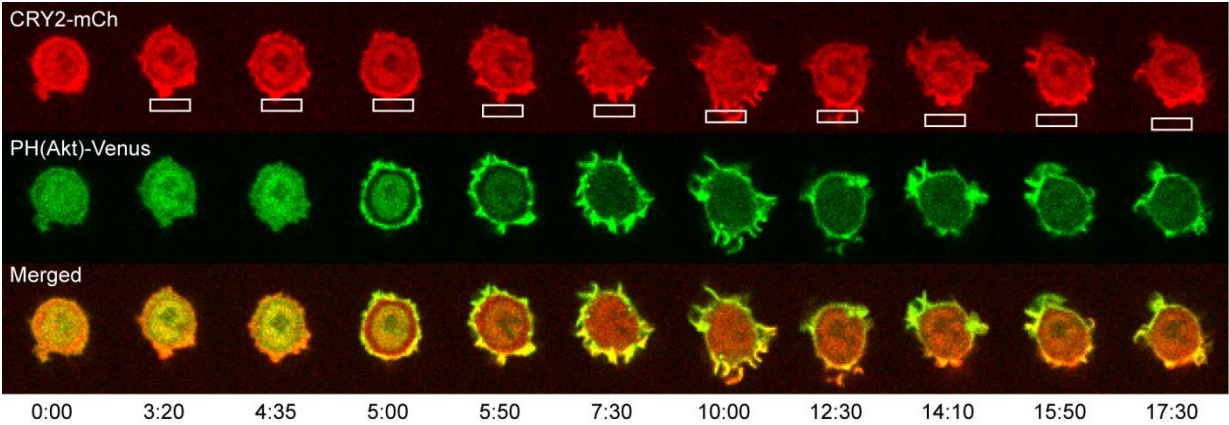



Figure S5.

10 $\mu$ M C5a agonist

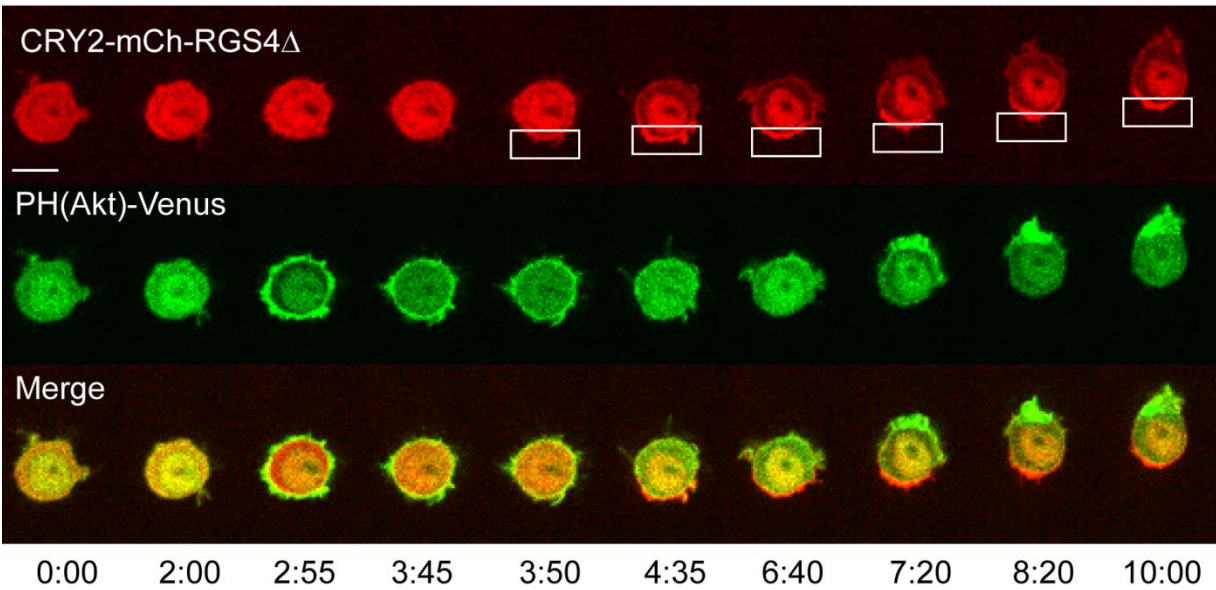

Figure S6.

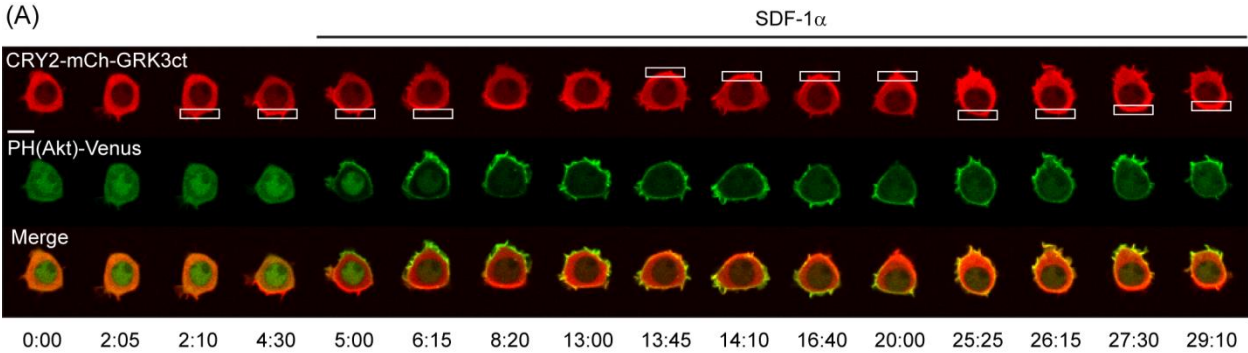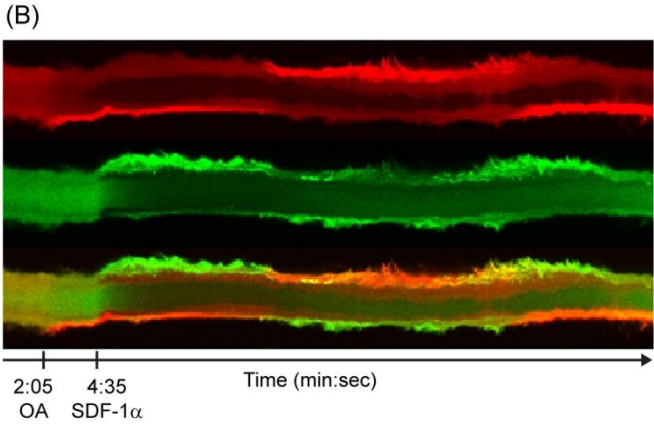

Figure S7.

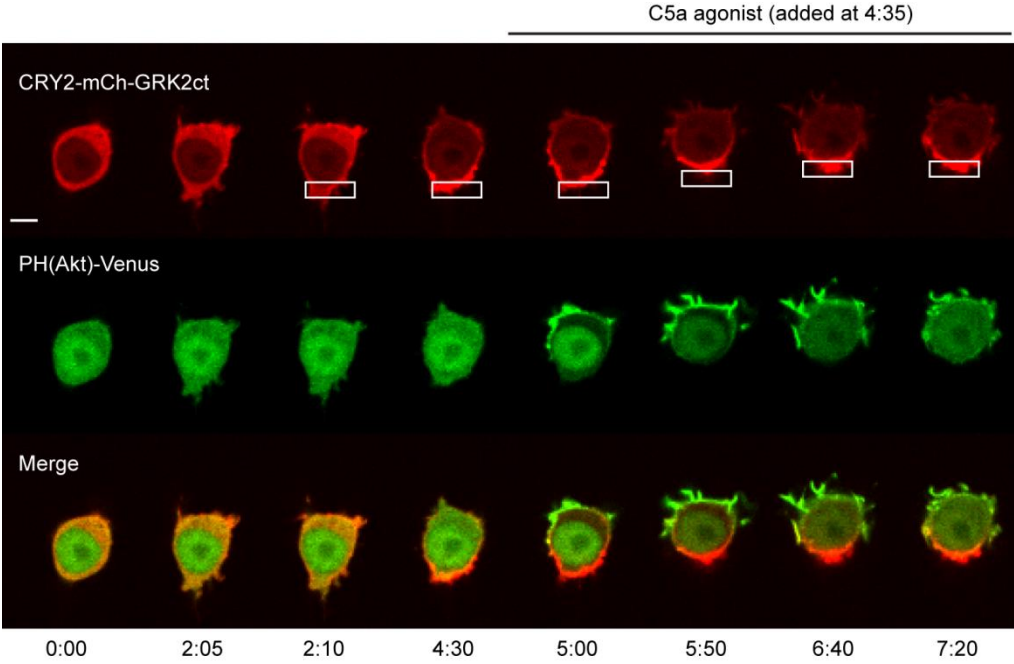

Supplement: supp_E14-04-0870v1_E14-04-0870_SupInfo.pdf [file supp_E14-04-0870v1_E14-04-0870_SupInfo.pdf]
